# Supplementary material for: Tropheryma whipplei: A Common Bacterium in Rural Senegal
Source: PLOS journal article supplement (doi:10.1371/journal.pntd.0001403), 2011-12-20
Supplement: S3 (10.1371/journal.pntd.0001403.s003) [file journal.pntd.0001403.s003]

**Table S2. Reference numbers of the nucleotide sequences detected in this study and deposited in GenBank.**

| **HVGs** | **Genotype** | **GenBank Accession numbers** |
| --- | --- | --- |
| **1** | 1 | EF363910.1 |
| 10 | JN575038 |
| 12 | JN575039 |
| 16 | JN575040 |
| 17 | JN575041 |
| 18 | JN575042 |
| 19 | JN575043 |
| 23 | JN575044 |
| 24 | JN575045 |
| **2** | 6 | EF363923.1 |
| 12 | JN575046 |
| 14 | JN575047 |
| 15 | JN575048 |
| 16 | JN575049 |
| 17 | JN575050 |
| 19 | JN575051 |
| 20 | JN575052 |
| 21 | JN575053 |
| 22 | JN575054 |
| **3** | 6 | EF363931.1 |
| 15 | JN575055 |
| 16 | JN575056 |
| 17 | JN575057 |
| 18 | JN575058 |
| 20 | JN575059 |
| 21 | JN575060 |
| 22 | JN575061 |
| 23 | JN575062 |
| 24 | JN575063 |
| 27 | JN575064 |
| 28 | JN575065 |
| **4** | 1 | EF363932.1 |
| 13 | JN575066 |
| 14 | JN575067 |
| 17 | JN575068 |
| 20 | JN575069 |
